# Supplementary material
Source: PubMed Central journal article supplement (PMC6842654)
Supplement: NIHMS1055924-supplement-1.pdf [file NIHMS1055924-supplement-1.pdf]

Supplementary Figure 1

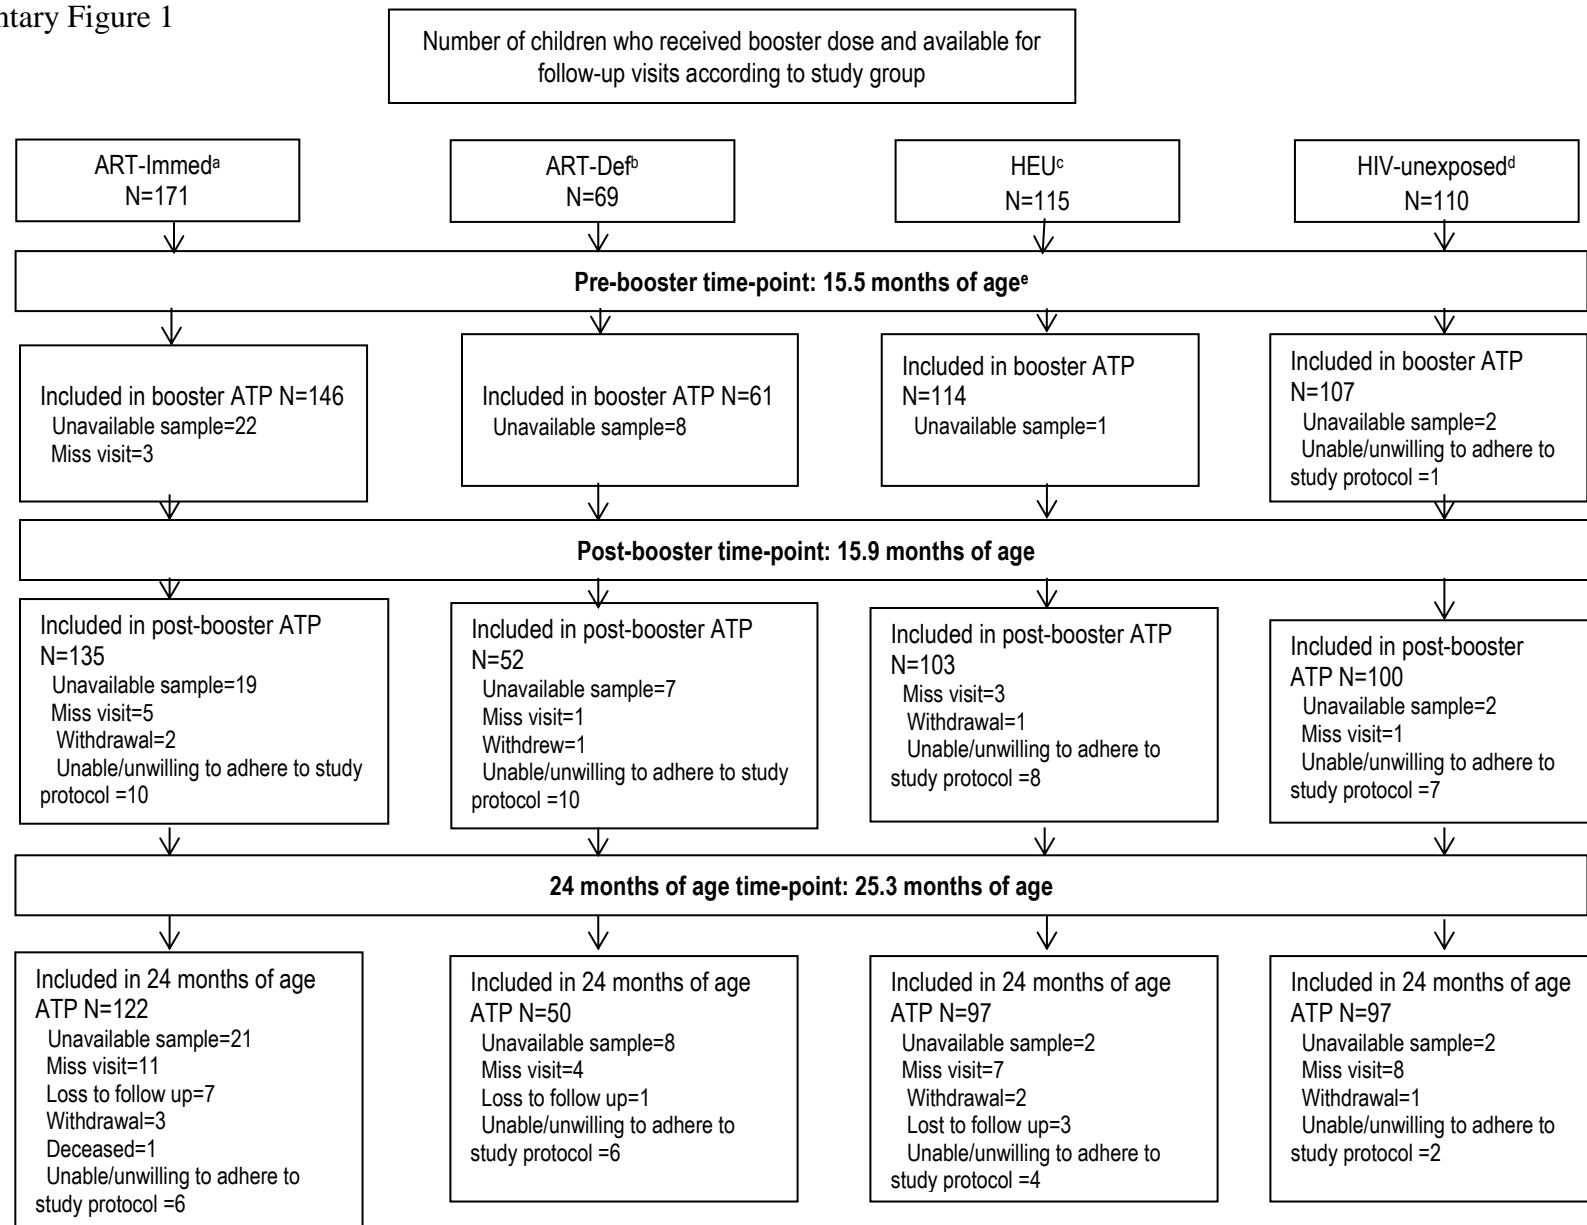

Supplementary Figure 1. Reasons for exclusion from analyses at the different study time-points.

<sup>a</sup>ART-Immed: HIV-infected children with CD4+%  $\geq 25\%$  at enrolment who were initiated on antiretroviral therapy (ART) at enrolment;

<sup>b</sup>ART-Def: HIV-infected children with CD4+  $\geq 25\%$  at enrolment randomized to deferred ART; <sup>c</sup>HEU: HIV-uninfected children born to HIV-infected mothers; <sup>d</sup>HIV-unexposed: HIV-uninfected children born to HIV-uninfected mothers; <sup>e</sup>Pre-booster: 15.5 months of age, all children received a booster dose of DTP and no booster dose of hepatitis-B vaccine was administered.

Explanatory notes: ATP: analysis time-point; Unavailable sample: sample unavailable for further testing; Lost to follow-up: due to relocation or the children stopped the study without reason; Withdrew: parent or guardian withdrew informed consent; Missed visit: children missed a schedule visit; Unable/unwilling to adhere to study protocol.

Number of participants who left the study (excluded, missed visit, lost to follow-up, withdrawals, deceased) are represented as cumulative pre- and post-vaccination.

Supplementary Table 1: Comparison of children included in analysis versus those not included in analysis.

| Variable                                                                             | All children included |                 | Children excluded from the current analysis |                | p-value              |                      |
|--------------------------------------------------------------------------------------|-----------------------|-----------------|---------------------------------------------|----------------|----------------------|----------------------|
| Number                                                                               | 465                   |                 | 29                                          |                |                      |                      |
| Male, n (%)                                                                          | 218 (47)              |                 | 19 (65)                                     |                | 0.051                |                      |
| Black race, n (%)                                                                    | 420 (90)              |                 | 29 (100)                                    |                | 0.079                |                      |
| Coloured race, n (%)                                                                 | 45 (10)               |                 | 0 (0)                                       |                |                      |                      |
| Soweto study center, n (%)                                                           | 312 (67)              |                 | 25 (86)                                     |                | 0.032                |                      |
| Stellenbosch study center, n (%)                                                     | 153 (33)              |                 | 4 (14)                                      |                |                      |                      |
| Mean time in months between last dose in primary series and booster dose ( $\pm$ SD) | 12.0 (0.6)            |                 | 12.9 (2.1)                                  |                | <0.001               |                      |
| Mean age in months ( $\pm$ SD)                                                       | 15.5 (0.5)            |                 | 15.3 (0.4)                                  |                | 0.148                |                      |
| Pre-booster <sup>a</sup>                                                             |                       |                 |                                             |                |                      |                      |
| Post-booster <sup>b</sup>                                                            | 15.9 (0.5)            |                 | 15.8 (0.5)                                  |                | 0.454                |                      |
| 24 months of age                                                                     | 25.3 (0.6)            |                 | 25.4 (0.6)                                  |                | 0.388                |                      |
|                                                                                      | ART-Immed.            | ART-Def         | ART-Immed.                                  | ART-Def        | p-value <sup>c</sup> | p-value <sup>d</sup> |
| Total initiated ART between first and last dose of primary series n/N (%)            | 146/146 (100)         | 9/61 (15)       | 25/25 (100)                                 | 2/8 (25)       | NE <sup>e</sup>      | 0.539                |
| Total on ART between last dose of primary series and booster dose n/N (%)            | 146/146 (100)         | 52/61 (85)      | 25/25 (100)                                 | 7/8 (88)       | NE                   | 0.962                |
| Time to ART initiation relative to dose 1 of primary series, median months (range)   | ND                    | 4 (3 to 8) n=59 | ND                                          | 3 (2 to 4) n=7 | ND                   | 0.183                |

<sup>a</sup>Blood draw was undertaken just prior to and on the same day of DTP booster vaccination;

<sup>b</sup>Children who received booster dose within protocol-defined window periods and available immunogenicity data within 1-2 weeks after booster; <sup>c</sup>p-value ART-Immed. all children included compared to ART-Immed. children excluded from the current analysis; <sup>d</sup>p-value ART-Def all infants included compared to ART-Def Infants excluded from the current analysis; <sup>e</sup>NE: not evaluable; <sup>f</sup>ND: not done.

Supplementary Table 2. Geometric mean concentrations and proportion of children in the two ART Immed groups with sero-protective antibody titers and sero-conversion rates at pre-booster, post-booster and at 2 years of age

| Antibody     | Threshold | Time-point                       | ART/12m <sup>a</sup> N=70 | ART/24m <sup>b</sup> N=76 | p-value             |
|--------------|-----------|----------------------------------|---------------------------|---------------------------|---------------------|
| TT           | GMC       | Pre-Booster                      | 0.08<br>(0.06-0.09)       | 0.08<br>(0.07-0.10)       | 0.40                |
|              |           | Post-booster                     | 7.3<br>(6.1-8.9)          | 6.0<br>(4.9-7.4)          | 0.24                |
|              |           | Fold-change <sup>c</sup>         | 100.5<br>(76.0-133.1)     | 78.1<br>(58.0-105.0)      | 0.45                |
|              |           | 24 months                        | 0.74<br>(0.60-0.92)       | 0.82<br>(0.68-0.98)       | 0.32                |
|              |           | Fold-change <sup>d</sup>         | 8.7<br>(6.7-11.3)         | 11.3<br>(9.3-13.7)        | 0.15                |
|              | ≥0.01     | Pre-booster:<br>N/n; % (95% CI)  | 69/70; 99<br>(92-100)     | 76/76; 100<br>(95-100)    | 0.30                |
|              |           | Post-booster:<br>N/n; % (95% CI) | 63/63; 100<br>(94-100)    | 72/72; 100<br>(95-100)    | NE <sup>e</sup>     |
|              |           | 24 months:<br>N/n; % (95% CI)    | 56/56; 100<br>(94-100)    | 66/66; 100<br>(95-100)    | NE                  |
|              | ≥0.1      | Pre-booster:<br>N/n; % (95% CI)  | 36/70; 51<br>(40-63)      | 36/76; 47<br>(37-58)      | 0.38                |
|              |           | Post-booster:<br>N/n; % (95% CI) | 63/63; 100<br>(94-100)    | 72/72; 100<br>(95-100)    | NE                  |
|              |           | 24 months:<br>N/n; % (95% CI)    | 56/56; 100<br>(94-100)    | 66/66; 100<br>(95-100)    | NE                  |
|              | ≥1        | Pre-booster:<br>N/n; % (95% CI)  | 0/70; 0                   | 1/76; 1<br>(0.2-7)        | 0.34                |
|              |           | Post-booster:<br>N/n; % (95% CI) | 61/63; 97<br>(89-99)      | 69/72; 96<br>(88-99)      | 0.97                |
|              |           | 24 months:<br>N/n; % (95% CI)    | 18/56; 32<br>(21-45)      | 26/66; 39<br>(28-51)      | 0.96                |
|              | DT        | GMC                              | Pre-Booster               | 0.10<br>(0.9-0.12)        | 0.10<br>(0.08-0.11) |
| Post-booster |           |                                  | 3.2<br>(2.9-3.7)          | 2.8<br>(2.3-3.2)          | 0.23                |
| Fold-change  |           |                                  | 33.1<br>(26.6-41.4)       | 28.1<br>(21.8-36.3)       | 0.71                |
| 24 months    |           |                                  | 0.45<br>(0.38-0.54)       | 0.47<br>(0.39-0.55)       | 0.91                |
| Fold-change  |           |                                  | 4.2<br>(3.3-5.3)          | 5.0<br>(4.1-6.1)          | 0.45                |
| ≥0.01        |           | Pre-booster:<br>N/n; % (95% CI)  | 70/70; 100<br>(95-100)    | 76/76; 100<br>(95-100)    | NE                  |
|              |           | Post-booster:<br>N/n; % (95% CI) | 63/63; 100<br>(94-100)    | 72/72; 100<br>(95-100)    | NE                  |

|              |      |                                  |                         |                         |                     |
|--------------|------|----------------------------------|-------------------------|-------------------------|---------------------|
|              |      | 24 months:<br>N/n; % (95% CI)    | 56/56; 100<br>(94-100)  | 66/66; 100<br>(95-100)  | NE                  |
|              | ≥0.1 | Pre-booster:<br>N/n; % (95% CI)  | 40/70; 57<br>(46-68)    | 39/76; 51<br>(40-62)    | 0.84                |
|              |      | Post-booster:<br>N/n; % (95% CI) | 63/63; 100<br>(94-100)  | 72/72; 100<br>(95-100)  | NE                  |
|              |      | 24 months:<br>N/n; % (95% CI)    | 56/56; 100<br>(94-100)  | 65/66; 98.5<br>(92-100) | 0.36                |
|              | ≥1   | Pre-booster:<br>N/n; % (95% CI)  | 0/70; 0                 | 0/76; 0                 | NE                  |
|              |      | Post-booster:<br>N/n; % (95% CI) | 61/63; 97<br>(89-99)    | 64/72; 89<br>(80-94)    | 0.12                |
|              |      | 24 months:<br>N/n; % (95% CI)    | 7/56; 13<br>(6-24)      | 9/66; 14<br>(7-24)      | 0.75                |
| HBsAg        | GMC  | 15-18 months                     | 721.5<br>(573.6-907.5)  | 816.4<br>(647.0-1030.1) | 0.74                |
|              |      | 24 months                        | 211.8<br>(174.4-257.1)  | 271.1<br>(220.6-33.2)   | 0.67                |
|              |      | Fold-change                      | 0.33<br>(0.24-0.45)     | 0.34<br>(0.25-0.46)     | 0.75                |
|              | ≥10  | 15-18 months:<br>N/n; % (95% CI) | 70/70; 100<br>(95-100)  | 76/76; 100<br>(95-100)  | NE                  |
|              |      | 24 months:<br>N/n; % (95% CI)    | 56/56; 100<br>(94-100)  | 66/66; 100<br>(94-100)  | NE                  |
|              | ≥100 | 15-18 months:<br>N/n; % (95% CI) | 68/70; 97<br>(90-99)    | 74/76; 97<br>(91-99)    | 0.86                |
|              |      | 24 months:<br>N/n; % (95% CI)    | 53/56; 95<br>(85-98)    | 59/66; 89<br>(80-95)    | 0.34                |
|              | FHA  | GMC                              | Pre-Booster             | 36.1<br>(30.4-42.8)     | 32.2<br>(27.6-37.5) |
| Post-booster |      |                                  | 437.1<br>(354.3-539.4)  | 416.5<br>(346.9-500.0)  | 0.99                |
| Fold-change  |      |                                  | 12.8<br>(9.5-17.3)      | 13.2<br>(10.3-17.0)     | 0.55                |
| 24 months    |      |                                  | 208.3<br>(159.7-271.8)  | 190.4<br>(157.9-229.5)  | 0.74                |
| Fold-change  |      |                                  | 5.5<br>(4.1-7.5)        | 6.1<br>(4.8-7.7)        | 0.74                |
| ≥4 fold      |      | Post-booster:<br>N/n; % (95% CI) | 56/63; 90<br>(80-96)    | 60/69; 87<br>(77-93)    | 0.68                |
| PT           | GMC  | Pre-booster                      | 30.5<br>(26.2-35.6)     | 33.0<br>(28.6-37.5)     | 0.04                |
|              |      | Post-booster                     | 953.3<br>(741.9-1224.9) | 949.9<br>(749.4-1203.9) | 0.46                |
|              |      | Fold-change                      | 31.0<br>(22.6-42.5)     | 29.3<br>(22.4-38.2)     | 0.94                |

|  |         |                                  |                        |                        |      |
|--|---------|----------------------------------|------------------------|------------------------|------|
|  |         | 24 months                        | 255.3<br>(212.6-306.6) | 253.9<br>(214.5-300.6) | 0.98 |
|  |         | Fold-change                      | 8.3<br>(6.8-10.2)      | 8.0<br>(6.4-10.0)      | 0.83 |
|  | ≥4 fold | Post-booster:<br>N/n; % (95% CI) | 59/63; 95<br>(87-98)   | 67/69; 97<br>(90-99)   | 0.52 |

Footnote: Geometric mean concentration (95% confidence interval); Percentage of participants with concentration above threshold (95% confidence interval); Units for antibody to TT, DT, PT and FHA are IU/ml; Units for HBsAg are mIU/ml. <sup>a</sup>ART/12m: HIV-infected children with CD4+ ≥25% at enrolment who were initiated on ART at enrolment and in whom ART was interrupted at 12-months of age; <sup>b</sup>ART/24m: HIV-infected children with CD4+ ≥25% at enrolment who were initiated on ART at enrolment and in whom ART was interrupted at 24-months of age; <sup>d</sup>Fold-change: Fold-change in GMC between pre-booster and post-booster; <sup>e</sup>Fold-change: Fold-change in GMC between post-booster and 24 months of age; <sup>c</sup>NE: not evaluable.

#### Explanatory notes:

p-values were either calculated by linear or logistic regression and adjusted for age, gender, race, study center, pre-booster antibody concentration (for post-booster and 24 months of age time-points) and CD4+ cell percentage in HIV-infected children; or by Pearson's chi-square test for values in italics. Similar results were obtained by univariate analysis.

Supplementary Table 3. Geometric mean concentrations at pre-booster, post-booster and at 24 months of age

| Antibody | Threshold | Time-point               | HIV-unexposed <sup>a</sup><br>N=107 | ART-Immed <sup>b</sup><br>N=146 | p-value <sup>c</sup> | ART-Def <sup>d</sup><br>N=61 | p-value <sup>e</sup> | p-value <sup>f</sup> | HEU <sup>g</sup><br>N=114 | p-value <sup>h</sup> |
|----------|-----------|--------------------------|-------------------------------------|---------------------------------|----------------------|------------------------------|----------------------|----------------------|---------------------------|----------------------|
| TT       | GMC       | Pre-Booster              | 0.13<br>(0.12-0.15)                 | 0.08<br>(0.07-0.09)             | <0.001               | 0.11<br>(0.08-0.15)          | 0.09                 | 0.07                 | 0.13<br>(0.12-0.15)       | 0.47                 |
|          |           | Post-booster             | 17.9<br>(15.8-20.4)                 | 6.6<br>(5.7-7.6)                | <0.001               | 4.4<br>(3.2-6.1)             | <0.001               | 0.01                 | 15.4<br>(13.3-17.9)       | 0.72                 |
|          |           | Fold-change <sup>i</sup> | 135.6<br>(114.1-161.0)              | 87.9<br>(71.7-107.7)            | <0.001               | 39.8<br>(23.0-68.8)          | <0.001               | 0.001                | 116.6<br>(97.5-139.3)     | 0.72                 |
|          |           | 24 months                | 1.7<br>(1.5-1.9)                    | 0.79<br>(0.69-0.90)             | <0.001               | 0.23<br>(0.15-0.35)          | <0.001               | <0.001               | 1.3<br>(1.1-1.5)          | 0.01                 |
|          |           | Fold-change <sup>j</sup> | -10.1 (8.7-11.8)                    | -9.7 (8.0-11.7)                 | 0.74                 | -21.3 (13.8-32.7)            | <0.001               | 0.002                | -11.9 (9.8-14.5)          | 0.08                 |
| DT       | GMC       | Pre-Booster              | 0.08<br>(0.07-0.09)                 | 0.10<br>(0.09-0.11)             | 0.22                 | 0.12<br>(0.10-0.15)          | 0.05                 | 0.05                 | 0.07<br>(0.05-0.09)       | 0.07                 |
|          |           | Post-booster             | 3.9<br>(3.5-4.3)                    | 3.0<br>(2.7-3.3)                | 0.15                 | 2.3<br>(1.8-3.0)             | 0.003                | 0.04                 | 4.6<br>(4.1-5.2)          | 0.002                |
|          |           | Fold-change <sup>i</sup> | 49.6<br>(41.4-59.4)                 | 30.4<br>(25.7-36.0)             | 0.08                 | 17.9<br>(12.2-26.2)          | 0.001                | 0.001                | 68.4<br>(48.9-95.8)       | 0.004                |
|          |           | 24 months                | 0.68<br>(0.60-0.77)                 | 0.46<br>(0.41-0.52)             | <0.001               | 0.20<br>(0.15-0.27)          | <0.001               | <0.001               | 0.61<br>(0.53-0.70)       | 0.37                 |
|          |           | Fold-change <sup>j</sup> | -5.5 (4.8-6.4)                      | -6.8 (5.8-8.0)                  | 0.008                | -11.4 (8.3-15.7)             | 0.001                | 0.008                | -7.7 (6.5-9.1)            | 0.004                |
| FHA      | GMC       | Pre-booster              | 24.6<br>(20.9-28.9)                 | 34.0<br>(30.3-38.1)             | 0.001                | 31.9<br>(26.9-38.0)          | 0.09                 | 0.23                 | 34.5<br>(30.1-39.6)       | 0.01                 |
|          |           | Post-booster             | 467.6<br>(395.8-552.4)              | 426.0<br>(371.6-488.3)          | 0.71                 | 402.2<br>(324.9-497.9)       | 0.78                 | 0.50                 | 806.2<br>(703.2-924.2)    | <0.001               |
|          |           | Fold-change <sup>i</sup> | 18.7<br>(14.8-23.6)                 | 13.0<br>(10.8-15.8)             | 0.22                 | 12.3<br>(9.1-16.6)           | 0.36                 | >0.99                | 23.1<br>(19.0-28.1)       | 0.01                 |
|          |           | 24 months                | 170.3                               | 198.4                           | 0.26                 | 103.9<br>(70.3-153.7)        | 0.02                 | 0.001                | 140.9                     | 0.14                 |

|       |     |                          |                        |                      |        |                     |        |        |                        |        |
|-------|-----|--------------------------|------------------------|----------------------|--------|---------------------|--------|--------|------------------------|--------|
|       |     |                          | (151.2-191.8)          | (169.7-232.0)        |        |                     |        |        | (120.1-165.4)          |        |
|       |     | Fold-change <sup>j</sup> | -2.6 (2.1-3.2)         | -2.1 (1.7-2.6)       | 0.40   | -3.6 (2.3-5.6)      | 0.04   | 0.03   | -5.8 (4.8-7.0)         | <0.001 |
| PT    | GMC | Pre-booster              | 38.3 (33.9-43.3)       | 31.8 (28.7-35.2)     | 0.004  | 27.2 (21.6-34.2)    | 0.004  | 0.38   | 39.5 (35.3-44.3)       | 0.64   |
|       |     | Post-booster             | 2168.8 (1856.7-2533.3) | 951.5 (802.7-1127.8) | <0.001 | 767.6 (594.8-990.7) | <0.001 | 0.19   | 3138.2 (2650.6-3715.5) | <0.001 |
|       |     | Fold-change <sup>i</sup> | 56.1 (45.6-69.0)       | 30.1 (24.6-36.8)     | 0.01   | 27.9 (18.3-42.5)    | 0.04   | 0.89   | 79.7 (65.7-96.7)       | 0.001  |
|       |     | 24 months                | 268.4 (228.3-315.5)    | 254.6 (225.3-287.7)  | 0.54   | 67.2 (47.9-94.3)    | <0.001 | <0.001 | 348.6 (288.6-421.2)    | 0.09   |
|       |     | Fold-change <sup>j</sup> | -7.7 (6.1-9.7)         | -4.0 (3.3-4.9)       | 0.001  | -12.0 (8.6-16.7)    | 0.01   | <0.001 | -9.6 (7.6-12.2)        | 0.06   |
| HBsAg | GMC | 5 months <sup>k</sup>    | 2521.0 (2249.8-2824.9) | 924.9 (778.3-1099.1) | <0.001 | 536.6 (373.0-772.0) | <0.001 | 0.02   | 2019.3 (1740.3-2343.0) | 0.04   |
|       |     | 15-18 months             | 1198.5 (1033.9-1389.4) | 769.4 (654.4-904.7)  | 0.001  | 700.2 (587.3-834.7) | 0.002  | 0.55   | 880.1 (719.2-1077.0)   | 0.02   |
|       |     | Fold-change <sup>l</sup> | -2.1 (1.8-2.5)         | -1.2 (0.9-1.5)       | <0.001 | 0.8 (0.50-1.3)      | <0.001 | 0.13   | -2.3 (1.8-3.0)         | 0.78   |
|       |     | 24 months                | 396.1 (332.5-471.8)    | 242.0 (209.9-279.1)  | 0.001  | 54.8 (32.2-93.0)    | <0.001 | <0.001 | 311.9 (264.8-367.4)    | 0.11   |
|       |     | Fold-change <sup>m</sup> | -3.0 (2.5-3.7)         | -3.0 (2.4-3.7)       | 0.94   | -13.3 (7.6-23.2)    | <0.001 | <0.001 | -3.0 (2.3-4.0)         | 0.97   |

Footnote: Geometric mean concentration (95% confidence interval); Units for geometric mean concentration (GMC) are IU/ml for TT, DT, FHA and PT; mIU/ml for HBsAg. <sup>a</sup>HIV-unexposed: HIV-uninfected children born to HIV-uninfected mothers; <sup>b</sup>ART-Immed: HIV-infected children with CD4+  $\geq$ 25% at enrolment who were initiated on ART at enrolment; <sup>c</sup>P value: HIV-unexposed vs. ART-Immed;



<sup>d</sup>ART-Def: HIV-infected children with CD4+  $\geq 25\%$  at enrolment randomized to deferred ART; <sup>e</sup>*P* value: HIV-unexposed vs. ART-Def; <sup>f</sup>*P* value: ART-Immed vs. ART-Def; <sup>g</sup>HEU: HIV-uninfected children born to HIV-infected mothers; <sup>h</sup>*P* value: HIV-unexposed vs. HEU; <sup>i</sup>Fold-change: Fold-change in GMC between pre-booster and post-booster; <sup>j</sup>Fold-change: Fold-change in GMC between post-booster and 24 months of age; <sup>k</sup>5 months: results of primary vaccination and have been published in Simani et al 2014 [1]; <sup>l</sup>Fold-change: Fold-change in GMC between 5 months and 15-18 months of age; <sup>m</sup>Fold-change: Fold-change in GMC between 15-18 months and 24 months of age.

#### Explanatory notes:

Geometric mean concentration: All p-values were calculated by linear regression and adjusted for age, gender, race, study center, pre-booster antibody concentration (for post-booster and 24 months time-point) and CD4+ cell percentage in HIV-infected children.

Supplementary Table 4. Percentage of children with sero-protective antibody titers at pre-booster, post-booster and at 24 months of age

| Antibody | Threshold | Time-point                          | HIV-unexposed <sup>a</sup><br>N=107 | ART-Immed <sup>b</sup><br>N=146 | p-value <sup>c</sup> | ART-Def <sup>d</sup><br>N=61 | p-value <sup>e</sup> | p-value <sup>f</sup> | HEU <sup>g</sup><br>N=114   | p-value <sup>h</sup> |
|----------|-----------|-------------------------------------|-------------------------------------|---------------------------------|----------------------|------------------------------|----------------------|----------------------|-----------------------------|----------------------|
| TT       | ≥0.01     | Pre-booster:<br>n/N; %<br>(95% CI)  | 107/107;<br>100<br>(97-100)         | 145/146; 99<br>(96-100)         | 0.39                 | 61/61; 100<br>(94-100)       | NE                   | 0.52                 | 114/114;<br>100<br>(97-100) | NE <sup>i</sup>      |
|          |           | Post-booster:<br>n/N; %<br>(95% CI) | 100/100;<br>100<br>(96-100)         | 135/135;<br>100<br>(97-100)     | NE                   | 52/52; 100<br>(93-100)       | NE                   | NE                   | 103/103;<br>100<br>(96-100) | NE                   |
|          |           | 24 months:<br>n/N; %<br>(95% CI)    | 97/97; 100<br>(96-100)              | 122/122;<br>100<br>(97-100)     | NE                   | 48/50; 96<br>(87-99)         | 0.05                 | 0.03                 | 97/97; 100<br>(96-100)      | NE                   |
|          | ≥0.1      | Pre-booster:<br>n/N; %<br>(95% CI)  | 85/107; 79<br>(71-86)               | 72/146; 49<br>(41-57)           | <0.001               | 26/61; 43<br>(31-55)         | <0.001               | 0.38                 | 90/114; 79<br>(71-85)       | 0.63                 |
|          |           | Post-booster:<br>n/N; %<br>(95% CI) | 100/100;<br>100<br>(96-100)         | 135/135;<br>100<br>(97-100)     | NE                   | 52/52; 100<br>(93-100)       | NE                   | NE                   | 103/103;<br>100<br>(96-100) | NE                   |
|          |           | 24 months:<br>n/N; %<br>(95% CI)    | 97/97; 100<br>(96-100)              | 122/122;<br>100<br>(97-100)     | NE                   | 36/50; 72<br>(58-83)         | <0.001               | <0.001               | 95/97; 98<br>(93-99)        | 0.16                 |
|          | ≥1        | Pre-booster:<br>n/N; %<br>(95% CI)  | 0/107; 0                            | 1/146; 0.7<br>(0.1-4)           | 0.39                 | 1/61; 2<br>(0.3-9)           | 0.18                 | 0.47                 | 1/114; 0.9<br>(0.2-5)       | 0.33                 |

|    |       |                                     |                             |                             |        |                        |        |       |                             |       |
|----|-------|-------------------------------------|-----------------------------|-----------------------------|--------|------------------------|--------|-------|-----------------------------|-------|
|    |       | Post-booster:<br>n/N; %<br>(95% CI) | 100/100;<br>100<br>(96-100) | 130/135; 96<br>(92-98)      | 0.05   | 44/52; 85<br>(73-92)   | <0.001 | 0.01  | 103/103;<br>100<br>(96-100) | NE    |
|    |       | 24<br>months:<br>n/N; %<br>(95% CI) | 74/97; 76<br>(67-84)        | 44/122; 36<br>(28-45)       | <0.001 | 7/50; 14<br>(7-26)     | <0.001 | 0.01  | 64/97; 66<br>(56-75)        | 0.05  |
| DT | ≥0.01 | Pre-booster:<br>n/N; %<br>(95% CI)  | 107/107;<br>100<br>(97-100) | 146/146;<br>100<br>(97-100) | NE     | 61/61; 100<br>(94-100) | NE     | NE    | 105/114; 92.<br>(86-96)     | 0.003 |
|    |       | Post-booster:<br>n/N; %<br>(95% CI) | 100/100;<br>100<br>(96-100) | 135/135;<br>100<br>(97-100) | NE     | 52/52; 100<br>(93-100) | NE     | NE    | 103/103;<br>100<br>(96-100) | NE    |
|    |       | 24<br>months:<br>n/N; %<br>(95% CI) | 97/97; 100<br>(96-100)      | 122/122;<br>100<br>(97-100) | NE     | 50/50; 100<br>(93-100) | NE     | NE    | 97/97; 100<br>(96-100)      | NE    |
|    | ≥0.1  | Pre-booster:<br>n/N; %<br>(95% CI)  | 41/107; 38<br>(30-48)       | 79/146; 54<br>(46-62)       | 0.001  | 35/61; 57<br>(45-69)   | 0.02   | 0.95  | 61/114; 54<br>(44-62)       | 0.03  |
|    |       | Post-booster:<br>n/N; %<br>(95% CI) | 100/100;<br>100<br>(96-100) | 135/135;<br>100<br>(97-100) | NE     | 52/52; 100<br>(93-100) | NE     | NE    | 103/103;<br>100<br>(96-100) | NE    |
|    |       | 24<br>months:<br>n/N; %<br>(95% CI) | 96/97; 99<br>(94-100)       | 121/122; 99<br>(96-100)     | 0.76   | 40/50; 80<br>(67-89)   | 0.02   | 0.004 | 95/97; 98<br>(93-99)        | 0.49  |
|    | ≥1    | Pre-booster:<br>n/N; %<br>(95% CI)  | 0/107; 0                    | 0/146; 0                    | NE     | 0/61; 0                | NE     | NE    | 0/114; 0                    | NE    |

|      |                                  |                                        |                             |                             |       |                        |        |        |                             |      |
|------|----------------------------------|----------------------------------------|-----------------------------|-----------------------------|-------|------------------------|--------|--------|-----------------------------|------|
|      |                                  | Post-booster:<br>n/N; %<br>(95% CI)    | 99/100; 99<br>(95-100)      | 125/135; 93<br>(87-96)      | 0.08  | 44/52; 85<br>(73-92)   | 0.02   | 0.14   | 100/103; 97<br>(92-99)      | 0.45 |
|      |                                  | 24<br>months:<br>n/N; %<br>(95% CI)    | 31/97; 32<br>(24-42)        | 16/122; 13<br>(8-20)        | 0.001 | 1/50; 2<br>(0.3-1.0)   | 0.003  | 0.03   | 26/97; 27<br>(19-36)        | 0.40 |
| FHA  | ≥4 fold<br>increase <sup>j</sup> | Post-booster:<br>n/N; %<br>(95% CI)    | 91/100; 91<br>(84-95)       | 116/131; 89<br>(82-93)      | 0.75  | 45/50; 90<br>(79-96)   | 0.99   | 0.69   | 100/103; 97<br>(92-99)      | 0.06 |
| PT   | ≥4 fold<br>increase              | Post-booster:<br>n/N; %<br>(95% CI)    | 99/100; 99<br>(95-100)      | 126/131; 96<br>(91-98)      | 0.31  | 45/50; 90<br>(79-96)   | 0.10   | 0.19   | 102/103; 99<br>(95-100)     | 0.88 |
| HepB | ≥10                              | 15-18<br>months:<br>n/N; %<br>(95% CI) | 107/107;<br>100<br>(97-100) | 146/146;<br>100<br>(97-100) | NE    | 61/61; 100<br>(94-100) | NE     | NE     | 114/144;<br>100<br>(97-100) | NE   |
|      |                                  | 24<br>months:<br>n/N; %<br>(95% CI)    | 97/97; 100<br>(96-100)      | 122/122;<br>100<br>(97-100) | NE    | 36/50; 72<br>(58-83)   | <0.001 | <0.001 | 97/97; 100<br>(96-100)      | NE   |
|      | ≥100                             | 15-18<br>months:<br>n/N; %<br>(95% CI) | 107/107;<br>100<br>(97-100) | 142/146; 97<br>(93-99)      | 0.08  | 61/61; 100<br>(94-100) | NE     | 0.19   | 107/114; 94<br>(88-97)      | 0.01 |
|      |                                  | 24<br>months:<br>n/N; %<br>(95% CI)    | 93/97; 96<br>(90-98)        | 112/122; 92<br>(86-96)      | 0.28  | 25/50; 50<br>(37-63)   | <0.001 | <0.001 | 89/97; 92<br>(85-96)        | 0.17 |

Footnote: Percentage of participants with concentration above threshold (95% confidence interval) Units are IU/ml for TT, DT, FHA

and PT; mIU/ml for HBsAg. <sup>a</sup>HIV-unexposed: HIV-uninfected children born to HIV-uninfected mothers; <sup>b</sup>ART-Immed: HIV-infected

children with CD4+  $\geq 25\%$  at enrolment who were initiated on ART at enrolment; <sup>c</sup>p-value: HIV-unexposed vs. ART-Immed; <sup>d</sup>ART-Def: HIV-infected children with CD4+  $\geq 25\%$  at enrolment randomized to deferred ART; <sup>e</sup>p-value: HIV-unexposed vs. ART-Def; <sup>f</sup>p-value: ART-Immed vs. ART-Def; <sup>g</sup>HEU: HIV-uninfected children born to HIV-infected mothers; <sup>h</sup>p-value: HIV-unexposed vs. HEU; <sup>i</sup>NE: not evaluable; <sup>j</sup> $\geq 4$  fold increase: sero-conversion rate, children showing 4 fold increase in antibody concentration from pre-booster to post-booster dose.

Explanatory notes: Percentage participants: p-values were either calculated by logistic regression and adjusted for age, gender, race, study center, pre-booster antibody concentration (for post-booster and 24 months time-point) and CD4+ cell percentage in HIV-infected children; or by Pearson's chi-square test for values in italics.
